# Supplementary material for: ‘They Are Kids, Let Them Eat’: A Qualitative Investigation into the Parental Beliefs and Practices of Providing a Healthy Diet for Young Children among a Culturally Diverse and Deprived Population in the UK
Source: MDPI journal article supplement (doi:10.3390/ijerph182413087), 2021-12-11
Supplement: s1 [file s1]

## Supplementary File S1: Topic Guide Questions

*I would like to ask you a little bit about feeding your child from birth through to weaning.*

- *What feeding method did you choose for your new-born baby?*
  - *Probe: whether they breast fed and or/formula, exclusively breast feeding or combined, expressed the breast milk, duration.*
  - *Probe: child's response to feeding method.*
- *Who/what influenced your decisions about feeding your child/children?*
  - *Probe: for breast feeding vs. formula feeding, family, friends, internet, TV, radio, midwives, health visitors, cost, availability, culture and religion.*
- *What was your (and your wife's/partner's) experience of feeding your child/children?*
  - *Probe: for breast feeding vs. formula feeding, difficulties and easy/good. If received support/advice or not, who was support/advice from.*
- *What services/interventions did you access to support you and what were your experiences of accessing these*
  - *Probe: Breastfeeding clinics, healthcare professionals, other*
